# Supplementary material for: Undifferentiated-predominant mixed-type early gastric cancer is more aggressive than pure undifferentiated type: a systematic review and meta-analysis
Source: HighWire-hosted journal article supplement (doi:10.1136/bmjopen-2021-054473), 2022-04-01
Supplement: bmjopen-2021-054473supp001_data_supplement.pdf [file bmjopen-2021-054473supp001_data_supplement.pdf]

Search strategy in PubMed:

- #1. (stomach neoplasma[MeSH Terms]) OR (early gastric cancer[Title/Abstract]) OR (EGC[Title/Abstract]) OR (early gastric carcinoma[Title/Abstract]) OR (mucosal[Title/Abstract]) OR (submucosal[Title/Abstract])
- #2. (mixed type) OR (mixed histology) OR (undifferentiated) [Title/Abstract]
- #3. #1 to #2
- #4. #3 And English
